# Supplementary material for: Large improvement in thermoelectric performance of pressure-tuned Mg3Sb2
Source: Royal Society of Chemistry journal article supplement (doi:10.1039/d1ra08930g), 2022-01-01
Supplement: d1ra08930g1.pdf [file d1ra08930g1.pdf]

## Supporting Information

# Large improvement in thermoelectric performance of pressure-tuned $\text{Mg}_3\text{Sb}_2$

Juan Li,<sup>\*</sup> Shuai Zhang, Kai Han, Bing Sun and Lianzhen Cao

*Department of Physics and Optoelectronic Engineering, Weifang University, Weifang 261061,  
China*

## Supplementary Table

**Table S1** The calculated total energy (eV) of  $\text{Mg}_3\text{Sb}_2$  with a series of  $k$ -mesh at different pressure using PBE functional.

| $k$ -mesh | 2 GPa    | 4 GPa    | 8 GPa    | 10 GPa   |
|-----------|----------|----------|----------|----------|
| 10×10×6   | -14.6208 | -14.5460 | -14.3032 | -14.1498 |
| 12×12×8   | -14.6207 | -14.5454 | -14.3031 | -14.1497 |
| 16×16×12  | -14.6207 | -14.5453 | -14.3030 | -14.1496 |
